# Supplementary material
Source: Springer Nature journal article supplement (https://www.springermedizin.de/resource/supplementary/12884_2006_97_MOESM1_ESM.pdf/9459618)
Supplement: MOESM1 [file 9459618]

# Improving the quality of reports of meta-analyses of randomised controlled trials: the QUOROM statement checklist

| Heading             | Subheading                  | Descriptor                                                                                                                                                                                                                                                                                                                                 | Reported? (Y/N) | Page number |
|---------------------|-----------------------------|--------------------------------------------------------------------------------------------------------------------------------------------------------------------------------------------------------------------------------------------------------------------------------------------------------------------------------------------|-----------------|-------------|
| <b>Title</b>        |                             | Identify the report as a meta-analysis [or systematic review] of RCTs <sup>26</sup>                                                                                                                                                                                                                                                        | Y               | 1           |
| <b>Abstract</b>     |                             | Use a structured format <sup>27</sup>                                                                                                                                                                                                                                                                                                      | Y               | 2           |
|                     | <b>Describe</b>             |                                                                                                                                                                                                                                                                                                                                            |                 |             |
|                     | Objectives                  | The clinical question explicitly                                                                                                                                                                                                                                                                                                           | Y               | 2           |
|                     | Data sources                | The databases (ie, list) and other information sources                                                                                                                                                                                                                                                                                     | Y               | 2           |
|                     | Review methods              | The selection criteria (ie, population, intervention, outcome, and study design); methods for validity assessment, data abstraction, and study characteristics, and quantitative data synthesis in sufficient detail to permit replication                                                                                                 | Y               | 2           |
|                     | Results                     | Characteristics of the RCTs included and excluded; qualitative and quantitative findings (ie, point estimates and confidence intervals); and subgroup analyses                                                                                                                                                                             | Y               | 2           |
|                     | Conclusion                  | The main results                                                                                                                                                                                                                                                                                                                           | Y               | 3           |
|                     |                             | <b>Describe</b>                                                                                                                                                                                                                                                                                                                            |                 |             |
| <b>Introduction</b> |                             | The explicit clinical problem, biological rationale for the intervention, and rationale for review                                                                                                                                                                                                                                         | Y               | 4           |
| <b>Methods</b>      | Searching                   | The information sources, in detail <sup>28</sup> (eg, databases, registers, personal files, expert informants, agencies, hand-searching), and any restrictions (years considered, publication status, <sup>29</sup> language of publication <sup>30,31</sup> )                                                                             | Y               | 5           |
|                     | Selection                   | The inclusion and exclusion criteria (defining population, intervention, principal outcomes, and study design <sup>32</sup> )                                                                                                                                                                                                              | Y               | 5           |
|                     | Validity assessment         | The criteria and process used (eg, masked conditions, quality assessment, and their findings <sup>33-36</sup> )                                                                                                                                                                                                                            | Y               | 6           |
|                     | Data abstraction            | The process or processes used (eg, completed independently, in duplicate) <sup>35,36</sup>                                                                                                                                                                                                                                                 | Y               | 6           |
|                     | Study characteristics       | The type of study design, participants' characteristics, details of intervention, outcome definitions, &c, <sup>37</sup> and how clinical heterogeneity was assessed                                                                                                                                                                       | Y               | 6           |
|                     | Quantitative data synthesis | The principal measures of effect (eg, relative risk), method of combining results (statistical testing and confidence intervals), handling of missing data; how statistical heterogeneity was assessed; <sup>38</sup> a rationale for any a-priori sensitivity and subgroup analyses; and any assessment of publication bias <sup>39</sup> | Y               | 6,7         |
| <b>Results</b>      | Trial flow                  | Provide a meta-analysis profile summarising trial flow (see figure)                                                                                                                                                                                                                                                                        | Y               | 25          |
|                     | Study characteristics       | Present descriptive data for each trial (eg, age, sample size, intervention, dose, duration, follow-up period)                                                                                                                                                                                                                             | Y               | 8,9,20      |
|                     | Quantitative data synthesis | Report agreement on the selection and validity assessment; present simple summary results (for each treatment group in each trial, for each primary outcome); present data needed to calculate effect sizes and confidence intervals in intention-to-treat analyses (eg 2x2 tables of counts, means and SDs, proportions)                  | Y               | 9,10,26-30  |
| <b>Discussion</b>   |                             | Summarise key findings; discuss clinical inferences based on internal and external validity; interpret the results in light of the totality of available evidence; describe potential biases in the review process (eg, publication bias); and suggest a future research agenda                                                            | Y               | 11-15       |

## Quality of reporting of meta-analyses
